# Supplementary material for: Increased Ambulatory Care Copayments and Hospitalizations among the Elderly
Source: Atypon-hosted journal article supplement (doi:10.1056/nejmsa0904533), 2010-01-27
Supplement: nejm_trivedi_320sa1.pdf [file nejm_trivedi_320sa1.pdf]

## Supplementary Appendix

This appendix has been provided by the authors to give readers additional information about their work.

Supplement to: Trivedi AN, Moloo H, Mor V. Increased ambulatory care copayments and hospitalizations among the elderly. *N Engl J Med* 2010;362:320-8.

Figure 1. Difference-in-Difference Estimates for Annual Outpatient Visits for Each Matched Case-Control Pair

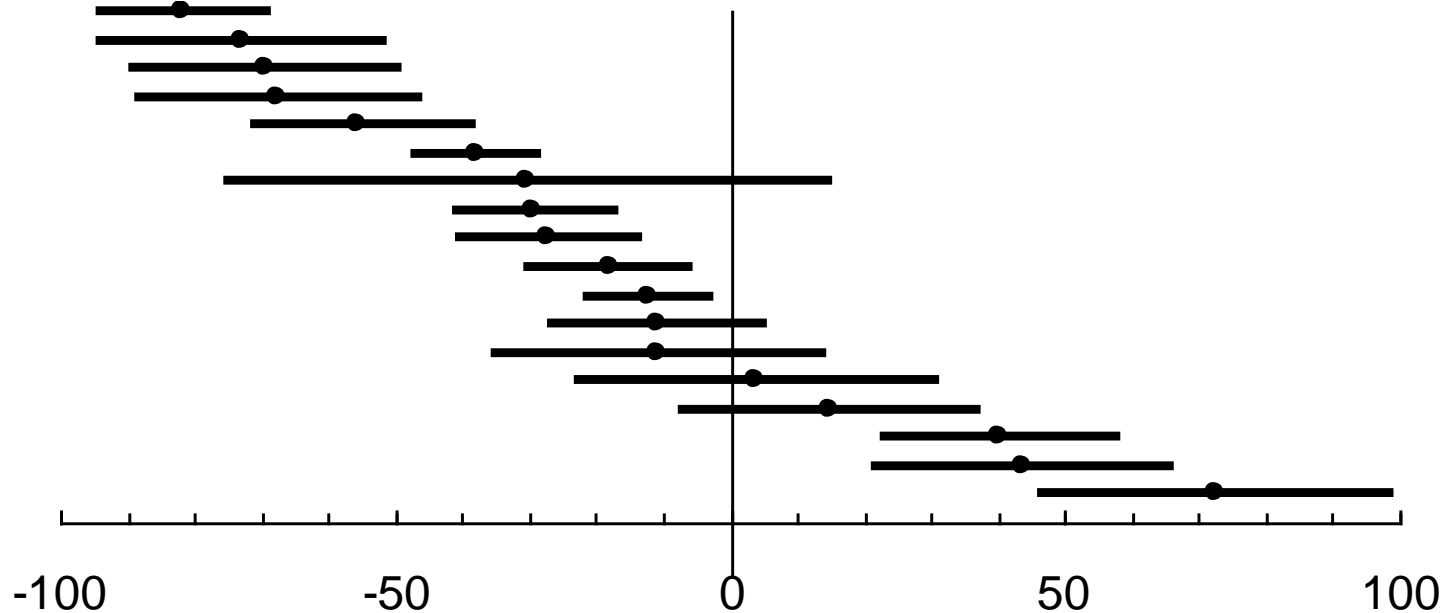

**Difference-in-Difference Estimates For Annual Outpatient Visits/100 Enrollees**

Note: Each estimate reflects the change in the number of annual outpatient visits per 100 enrollees for a case plan minus the concurrent change in annual outpatient visits for its matched control plan. Estimates adjusted for age, sex, ZIP Code-level income and ZIP Code-level education and repeated measurements of enrollees.

Figure 2. Difference-in-Difference Estimates for Annual Inpatient Admissions for Each Matched Case-Control Pair

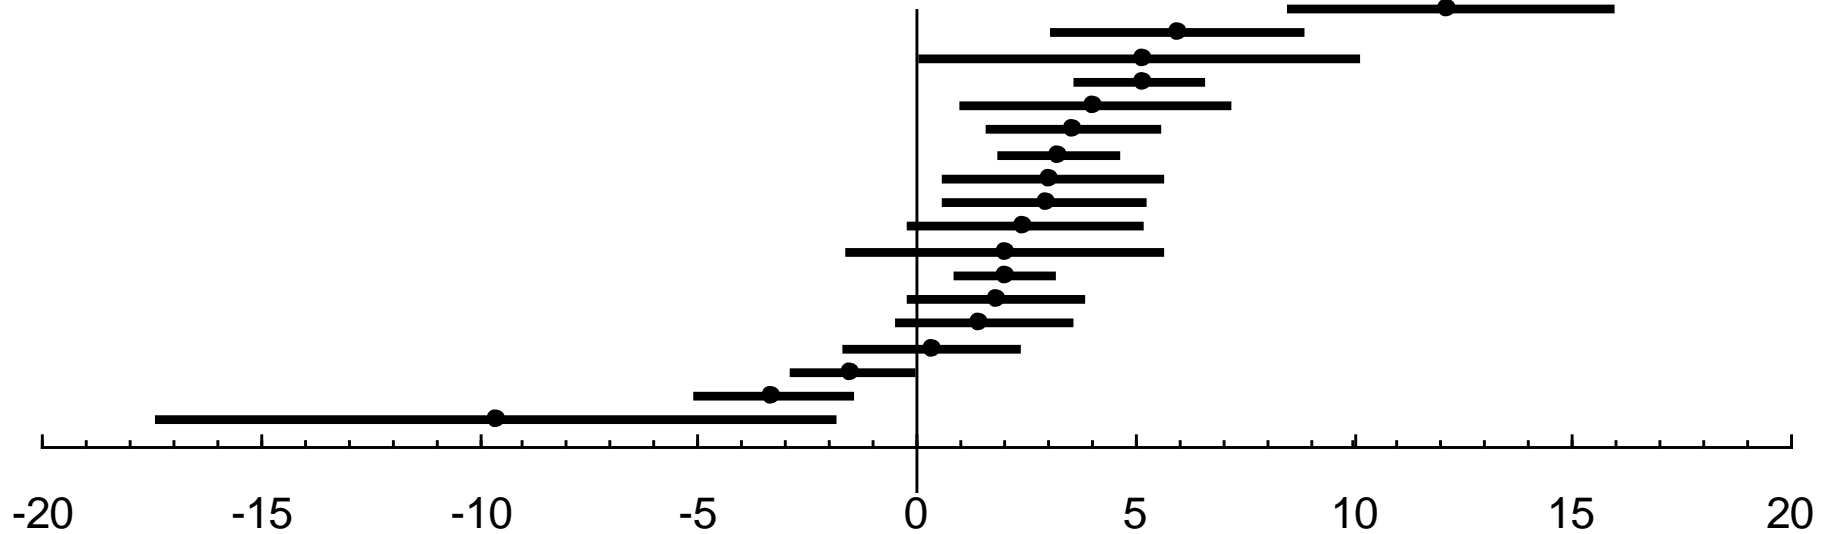

**Difference-in-Difference Estimates for Annual Inpatient Admission/100 Enrollees**

Note: Each estimate reflects the change in the number of annual inpatient admissions per 100 enrollees for a case plan minus the concurrent change in annual inpatient admissions for its matched control plan. Estimates adjusted for age, sex, ZIP Code-level income and ZIP Code-level education and repeated measurements of enrollees.
